# Supplementary material for: 3D paper-based microfluidic device: a novel dual-detection platform of bisphenol A
Source: Royal Society of Chemistry journal article supplement (doi:10.1039/c9an01738k), 2019-12-13
Supplement: c9an01738k1.pdf [file c9an01738k1.pdf]

## Supporting Information

### 3D Paper-Based Microfluidic Device: A Novel Dual-Detection Platform of Bisphenol A

Jutiporn Yukird<sup>a</sup>, Veasna Soum<sup>b</sup>, Oh-Sun Kwon<sup>b</sup>, Kwanwoo Shin<sup>b</sup>, Orawon Chailapakul<sup>c\*</sup>,  
Nadnudda Rodthongkum<sup>d\*</sup>

<sup>a</sup> *Nanoscience and Technology Program, Graduate School, Chulalongkorn University,  
Phayathai Road, Patumwan, Bangkok 10330, Thailand*

<sup>b</sup> *Department of Chemistry and Institute of Biological Interfaces, Sogang University, Seoul  
04107, Republic of Korea*

<sup>c</sup> *Electrochemistry and Optical Spectroscopy Research Unit, Department of Chemistry, Faculty  
of Science, Chulalongkorn University, Phayathai Road, Patumwan, Bangkok 10330, Thailand*

<sup>d</sup> *Metallurgy and Materials Science Research Institute, Chulalongkorn University, Soi Chula 12,  
Phayathai Road, Patumwan, Bangkok 10330, Thailand*

\*Corresponding authors at E-mail addresses: [Nadnudda.r@chula.ac.th](mailto:Nadnudda.r@chula.ac.th), [corawon@chula.ac.th](mailto:corawon@chula.ac.th)

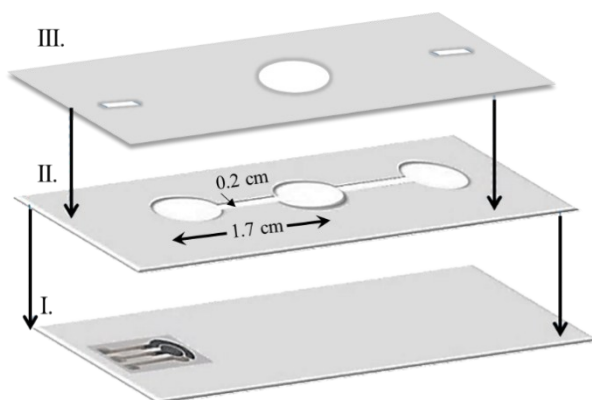

**Figure S1.** Illustration of the stacked layer of  $\mu$ PADs, fabricated from i.) planar surface (paper), ii) lateral-flow channel (plastic tape) and iii.) cover (plastic tape).

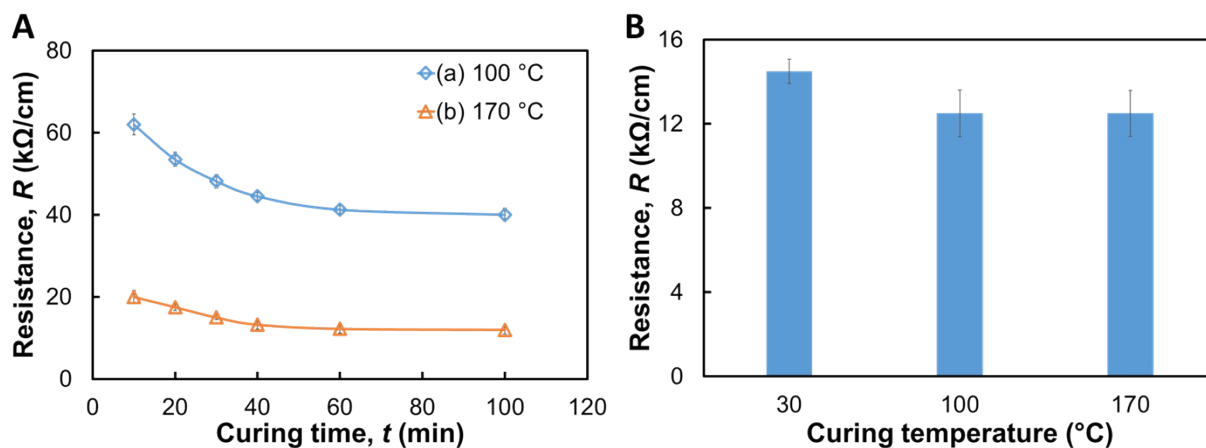

**Figure S2.** The temperature dependence of the resistivity for electrode printing with AgNPs line (A) and MWCNTs line (B).

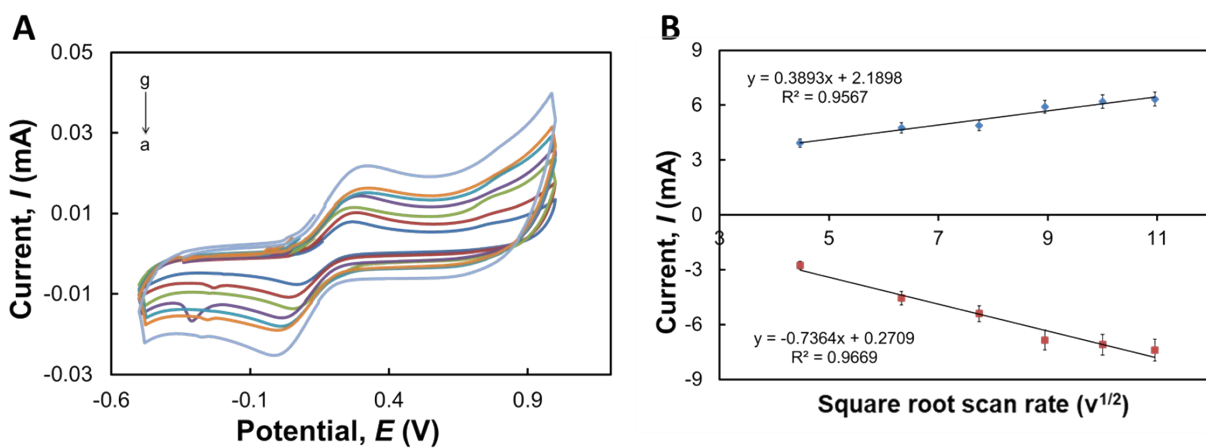

**Figure S3.** Cyclic voltammograms of 1.0 mM  $[\text{Fe}(\text{CN})_6]^{3-/4-}$  measured on MWCNTs electrode in KCl solution at different scan rates (0.2–1.5 V/s).

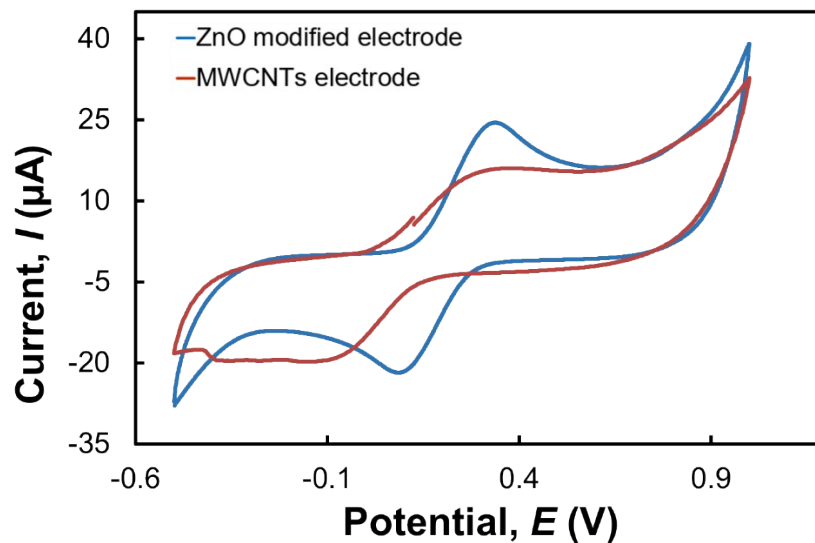

**Figure S4.** Cyclic voltammograms of 1.0 mM [Fe(CN)<sub>6</sub>]<sup>3-/4-</sup> measured on an unmodified electrode (red line) and ZnO/MWCNTs electrode (blue line).

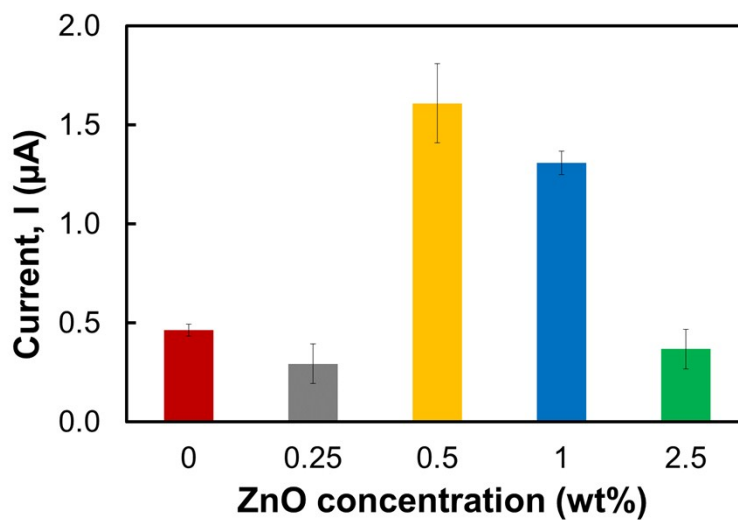

**Figure S5.** The oxidation peak currents of 0.5 mM BPA obtained from differential pulse voltammetry (DPV) with different ZnO concentrations modified electrode.

**Table 1** Comparison of the analytical performances for BPA determination by using different modified electrodes.

| Modified electrode                                                                                                                            | Reaction      | Diameter of WE | Method      | Linear range          | Detection limit | Ref. |
|-----------------------------------------------------------------------------------------------------------------------------------------------|---------------|----------------|-------------|-----------------------|-----------------|------|
| Graphene modified glassy carbon electrode                                                                                                     | Non-enzymatic | -              | DPV         | 0.5 nM to 1.0 $\mu$ M | 0.47 $\mu$ M    | [1]  |
| Reduce graphene oxide/melamine nanoparticle-modified glassy carbon electrode                                                                  | Non-enzymatic | 3.0 mm         | DPV         | 0.1 nM to 20 mM       | 4.0 nM          | [2]  |
| CTAB micellar medium on a screen-printed carbon electrode                                                                                     | Non-enzymatic | 2.0 mm         | SWV         | 1.0 to 10 $\mu$ M     | 0.51 $\mu$ M    | [3]  |
| Single-walled carbon nanotubes/poly{3-butyl-1-[3-(N-pyrrolyl)propyl] imidazolium ionic liquid composite film modified glassy carbon electrode | Non-enzymatic | 3.0 mm         | DPV         | 5.0 to 0.3 $\mu$ M    | 1.0 nM          | [4]  |
| Stacked graphene nanofibers/gold nanoparticles composite modified glassy carbon electrode                                                     | Non-enzymatic | 3.0 mm         | LSV         | 0.08 to 250 $\mu$ M   | 0.35 $\mu$ M    | [5]  |
| <i>f</i> -SWCNT and carboxylic group functionalized PEDOT modified GCE                                                                        | Non-enzymatic | 3.0 mm         | CV          | 0.099 to 5.79 $\mu$ M | 0.32 $\mu$ M    | [6]  |
| PEDOT-modified glassy carbon electrodes                                                                                                       | Non-enzymatic | 3.0 mm         | Amperometry | 40.0–410 $\mu$ M      | 22 $\mu$ M      | [7]  |
| Molecularly imprinted polymers and gold nanoparticles modified GCE                                                                            | Non-enzymatic | 3.0 mm         | Amperometry | 8.0 $\mu$ M–0.6 mM    | 0.38 $\mu$ M    | [8]  |
| Nitrogen-doped carbon nanofiber                                                                                                               | Non-          | -              | DPV         | 0.1 – 60 $\mu$ M      | 0.50 $\mu$ M    | [9]  |

|                                              |               |        |     |                      |              |           |
|----------------------------------------------|---------------|--------|-----|----------------------|--------------|-----------|
| modified carbon paste electrode              | enzymatic     |        |     |                      |              |           |
| ZnO/NPs carbon ionic liquid paste electrode  | Non-enzymatic | -      | SWV | 0.002 – 700 $\mu$ M  | 9.0 nM       | [10]      |
| CuO–ZnO/GO modified glassy carbon electrodes | Non-enzymatic | -      | SWV | 3.0 nM – 0.1 $\mu$ M | 0.88 nM      | [11]      |
| MWCNTs electrode                             | Non-enzymatic | 2.0 mm | DPV | 0.1 - 0.5 mM         | 6.0 $\mu$ M  | This work |
| 1.0 wt% ZnO modified MWCNTs electrode        | Non-enzymatic | 2.0 mm | DPV | 10 $\mu$ M – 5 mM    | 0.35 $\mu$ M | This work |

## References

1. B. Ntsendwana., B.B.M., S. Sampath., O.A. Arotiba., Electrochemical Detection of Bisphenol A Using Graphene-Modified Glassy Carbon Electrode. *Int. J. Electrochem. Sci.* 7(2012) 3501 - 3512.
2. Shen, R., W. Zhang, Y. Yuan, G. He, and H. Chen, Electrochemical detection of bisphenol A at graphene/melamine nanoparticle-modified glassy carbon electrode. *Journal of Applied Electrochemistry.* 45(4)(2015) 343-352.
3. Brugnera, M.F., M.A.G. Trindade, and M.V.B. Zanoni, Detection of Bisphenol A on a Screen-Printed Carbon Electrode in CTAB Micellar Medium. *Analytical Letters.* 43(18)(2010) 2823-2836.
4. Chen, X., T. Ren, M. Ma, Z. Wang, G. Zhan, and C. Li, Voltammetric sensing of bisphenol A based on a single-walled carbon nanotubes/poly{3-butyl-1-[3-(N-pyrrolyl)propyl]imidazolium ionic liquid} composite film modified electrode. *Electrochimica Acta.* 111(2013) 49-56.

5. Niu, X., W. Yang, G. Wang, J. Ren, H. Guo, and J. Gao, A novel electrochemical sensor of bisphenol A based on stacked graphene nanofibers/gold nanoparticles composite modified glassy carbon electrode. *Electrochimica Acta*. 98(2013) 167-175.
6. Zhang, L., Y.-P. Wen, Y.-Y. Yao, Z.-F. Wang, X.-M. Duan, and J.-K. Xu, Electrochemical sensor based on f-SWCNT and carboxylic group functionalized PEDOT for the sensitive determination of bisphenol A. *Chinese Chemical Letters*. 25(4)(2014) 517-522.
7. Mazzotta, E., C. Malitesta, and E. Margapoti, Direct electrochemical detection of bisphenol A at PEDOT-modified glassy carbon electrodes. *Analytical and Bioanalytical Chemistry*. 405(11)(2013) 3587-3592.
8. Qurashi, A., J.A. Rather, K. De Wael, B. Merzougui, N. Tabet, and M. Faiz, Rapid microwave synthesis of high aspect-ratio ZnO nanotetrapods for swift bisphenol A detection. *Analyst*. 138(17)(2013) 4764-4768.
9. Sun, J., Y. Liu, S. Lv, Z. Huang, L. Cui, and T. Wu, An Electrochemical Sensor Based on Nitrogen-doped Carbon Nanofiber for Bisphenol A Determination. *Electroanalysis*. 28(3)(2016) 439-444.
10. Najafi, M., M.A. Khalilzadeh, and H. Karimi-Maleh, A new strategy for determination of bisphenol A in the presence of Sudan I using a ZnO/CNTs/ionic liquid paste electrode in food samples. *Food Chemistry*. 158(2014) 125-131.
11. Ulubay Karabiberoğlu, Ş., Sensitive Voltammetric Determination of Bisphenol A Based on a Glassy Carbon Electrode Modified with Copper Oxide-Zinc Oxide Decorated on Graphene Oxide. *Electroanalysis*. 31(1)(2019) 91-102.
